# Supplementary figures and images for: Dynamics of nutrient uptake strategies: lessons from the tortoise and the hare
Source: PubMed Central journal article supplement — Theor Ecol. 2011 Jan 11;4(2):163–77. doi: 10.1007/s12080-010-0110-0 (PMC4270431; doi:10.1007/s12080-010-0110-0), 2011-01-11

$$c_{\text{res}} = 0.061933 \quad c_{\text{inv}} = 0.058789$$

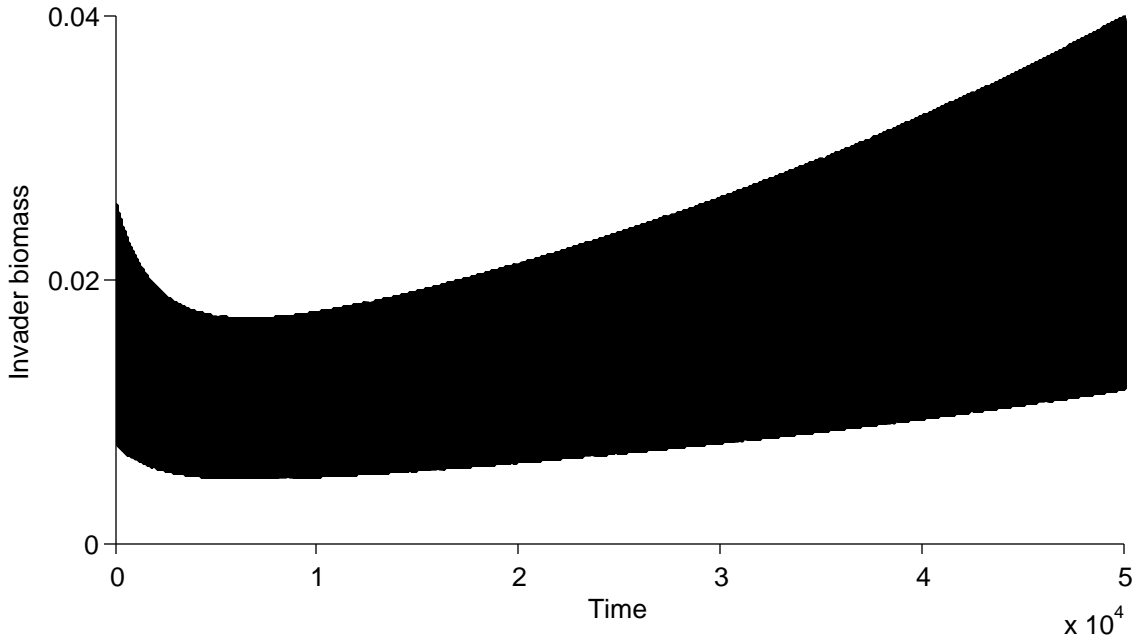

Supplement: 12080_2010_110_MOESM2_ESM.pdf [file 12080_2010_110_MOESM2_ESM.pdf]
